# Supplementary material for: Higher-Density Culture in Human Embryonic Stem Cells Results in DNA Damage and Genome Instability
Source: PubMed Central journal article supplement — Stem Cell Reports. 2016 Feb 25;6(3):330–41. doi: 10.1016/j.stemcr.2016.01.015 (PMC4788786; doi:10.1016/j.stemcr.2016.01.015), 2016-02-25
Supplement: mmc1.pdf [file mmc1.pdf]

**Stem Cell Reports, Volume 6**

**Supplemental Information**

**Higher-Density Culture in Human Embryonic Stem Cells Results in DNA  
Damage and Genome Instability**

**Kurt Jacobs, Filippo Zambelli, Afroditi Mertzaniidou, Ilse Smolders, Mieke Geens, Ha Thi  
Nguyen, Lise Barbé, Karen Sermon, and Claudia Spits**

# Supplementary Data – Higher density culture in human embryonic stem cells results in DNA damage and genome instability

|                                                                                                          |   |
|----------------------------------------------------------------------------------------------------------|---|
| SUPPLEMENTARY TABLE 1: OVERVIEW OF BIOLOGICAL AND TECHNICAL REPLICATES.                                  | 2 |
| SUPPLEMENTARY FIGURE 1: ABSOLUTE VALUES FOR DNA DAMAGE ASSAYS                                            | 3 |
| SUPPLEMENTARY TABLE 2: OVERVIEW OF CHROMOSOMAL CONTENT AND BREAKPOINTS OF THE DETECTED CNV'S.            | 4 |
| SUPPLEMENTARY FIGURE 2: OVERVIEW OF THE FLOW CYTOMETRY PROFILES FOR THE CELL CYCLE ANALYSIS              | 5 |
| SUPPLEMENTARY FIGURE 3: MRNA QUANTIFICATION OF THE PLURIPOTENCY MARKERS <i>NANOG</i> AND <i>POU5F1</i> . | 6 |
| SUPPLEMENTARY TABLE 3: OVERVIEW OF LACTATE CONCENTRATION AND PH OF ALL ANALYZED SAMPLES.                 | 7 |
| SUPPLEMENTARY TABLE 4: OVERVIEW OF ALL ABNORMALITIES DETECTED WITH FISH                                  | 8 |

### Supplementary Table 1: Overview of biological and technical replicates.

The hESC lines used in this study are listed per type of experiment and assay, with the number of biological replicates per cell line between brackets. A biological replicate is defined as a full and independent experiment. In the case of biological replicates involving the same hESC line, the cell cultures in different conditions were initiated on different days for each biological replicate. For each culture condition within one experiment, at least three wells were pooled to obtain sufficient material and reduce possible technical variation, as explained in the materials and methods section. The minimum number of analyzed cells or events per condition per replicate is listed under technical replicates.

ROS stands for 'Reactive Oxygen Species', PI for 'propidium iodide', qRT-PCR for 'quantitative real-time PCR', aCGH for 'array-based comparative genomic hybridization', HPLC for 'high performance liquid chromatography', FISH for 'fluorescent in situ hybridization'.

|                     | Assay                       | Biological replicates           | Technical replicates                               | Figure     |
|---------------------|-----------------------------|---------------------------------|----------------------------------------------------|------------|
| DNA damage          | Alkaline Comet Assay        | VUB07 (1), VUB14 (2), VUB31 (3) | ≥200 cells per condition                           | 1B,E ; S1C |
|                     | Neutral Comet Assay         | VUB14 (2), VUB31 (1)            | ≥200 cells per condition                           | 1C,F ; S1D |
|                     | γH2AX foci quantification   | VUB07 (2), VUB14 (2)            | ≥1000 cells per condition                          | 1D,G ; S1E |
| Metabolism          | Annexin V/PI Assay          | VUB14 (2), VUB31 (2)            | ≥2500 cells per condition                          | 3A         |
|                     | ROS analysis                | VUB14 (1), VUB31 (3)            | ≥10000 cells per condition                         | 3C         |
|                     | Cell Cycle Profiling        | VUB14 (2), VUB31 (2)            | ≥10000 events per condition                        | 3B         |
|                     | qRT-PCR                     | VUB14 (1), VUB31 (2)            | triplicates                                        | S3         |
| Chromosomal content | single-cell aCGH            | VUB31                           | 29 cells in condition A<br>30 cells in condition D | 2          |
| Medium analysis     | HPLC (day 5)                | VUB07 (3), VUB14 (3), VUB31 (3) | duplicates                                         | 3D,E       |
|                     | Glucose and Lactate (day 5) | VUB07 (3), VUB14 (3), VUB31 (3) | duplicates                                         | 3F,H       |
|                     | Folic acid (day 5)          | VUB07 (1), VUB14 (2), VUB31 (2) | duplicates                                         | Not shown  |
|                     | pH (day 5)                  | VUB14 (3), VUB31 (2)            | duplicates                                         | 3G         |
|                     | Lactate and pH (daily)      | VUB14 (2), VUB31 (1)            | single measurement                                 | 3I,J       |
| Lactate series      | Alkaline Comet Assay        | VUB31 (3)                       | ≥200 cells per condition                           | 4A,B       |
|                     | pH and Lactate Assay        | VUB31 (3)                       |                                                    | Table S3B  |
| pH series           | Alkaline Comet Assay        | VUB31 (3)                       | ≥200 cells per condition                           | 4C,D       |
|                     | pH and Lactate Assay        | VUB31 (3)                       |                                                    | Table S3C  |
| Prevention 1 series | Alkaline Comet Assay        | VUB31 (3)                       | ≥200 cells per condition                           | 5A         |
|                     | pH and Lactate Assay        | VUB31 (3)                       |                                                    | Table S3D  |
| Prevention 2 series | FISH                        | VUB14 (2), VUB31 (2)            | ≥400 cells per condition                           | 5B         |
| HEPES series        | Alkaline Comet Assay        | VUB07 (1), VUB14 (1), VUB31 (1) | ≥100 cells per condition                           | 5E         |
|                     | Cell Cycle Profiling        | VUB07 (1), VUB14 (1), VUB31 (1) | ≥10000 events per condition                        | 5F         |
| Laminin-521 series  | Alkaline Comet Assay        | VUB07 (1), VUB14 (1), VUB31 (1) | ≥100 cells per condition                           | 5H         |
|                     | Cell Cycle Profiling        | VUB07 (1), VUB14 (1), VUB31 (1) | ≥10000 events per condition                        | 5J         |
|                     | FISH                        | VUB07 (1), VUB14 (1), VUB31 (1) | ≥400 cells per condition                           | 5I         |

**Supplementary Figure 1: Absolute values for DNA damage assays**

A,B) representative pictures for an analysed cells for the COMET assay (A) and the  $\gamma$ H2AX staining (B). C-J) Plots of the absolute values (means  $\pm$  SEM) used to calculate the relative values presented in the main figures. C) corresponds to Figure 1B, D) corresponds to Figure 1C, E) corresponds to figure 1D, F) corresponds to Figure 4A, G) corresponds to Figure 4C, H) corresponds to figure 5A, I) corresponds to Figure 5D, J) corresponds to Figure 5F.

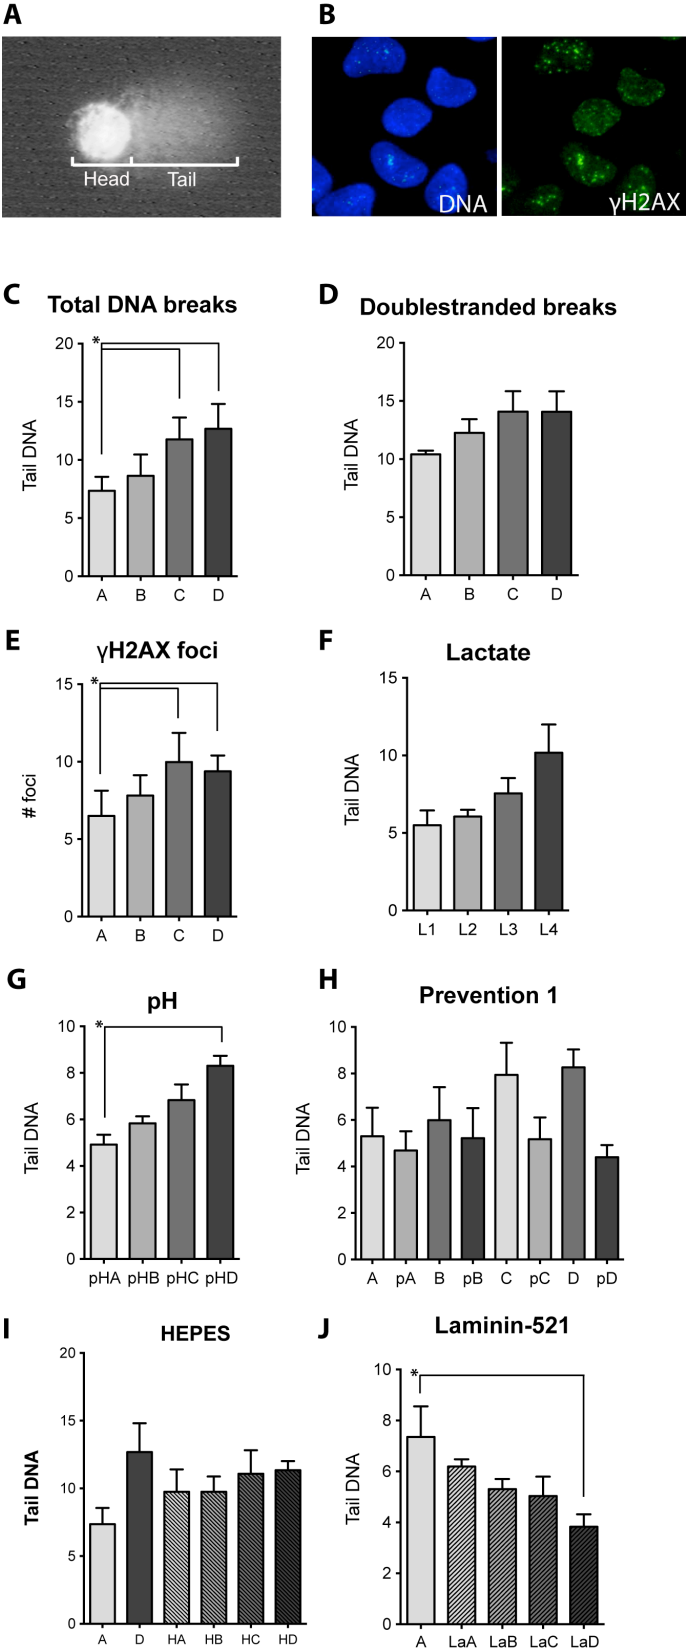

## Supplementary Table 2: Overview of chromosomal content and breakpoints of the detected CNV's.

All hESC with a normal (balanced female) or abnormal (unbalanced) chromosomal content are listed, and details on the detected CNVs are given. Chr. stands for chromosome, Mb stands for Megabase.

| Sample                   | Chromosomal content                                                             | Breakpoints |               |             |           |
|--------------------------|---------------------------------------------------------------------------------|-------------|---------------|-------------|-----------|
|                          |                                                                                 | Chr.        | StartPosition | EndPosition | Size (Mb) |
| <b>Condition A</b>       |                                                                                 |             |               |             |           |
| Balanced cells (N = 29)  | Balanced female                                                                 |             |               |             |           |
| <b>Condition D</b>       |                                                                                 |             |               |             |           |
| Balanced cells (N = 20)  | Balanced female                                                                 |             |               |             |           |
| Unbalanced cell (N = 10) |                                                                                 |             |               |             |           |
| VUB31_D_01               | Unbalanced female, dup(1)(q21.1q44)                                             | 1           | 144041843     | 248776442   | 104.7     |
| VUB31_D_03               | Unbalanced female, del(3)(p26.1)                                                | 3           | 233708        | 7685894     | 7.4       |
| VUB31_D_05               | Unbalanced female, dup(6)(p12.3p21.31),<br>dup(10)(p11.21q23.32)                | 6           | 36144335      | 51262134    | 15.1      |
|                          |                                                                                 | 10          | 37583025      | 93835221    | 56.3      |
| VUB31_D_09               | Unbalanced female, dup(1)(q21.1q44)                                             | 1           | 144041843     | 248776442   | 104.7     |
| VUB31_D_10               | Unbalanced female,<br>dup(3)(q21.3q23),dup(15)(q21.2q23),<br>dup(18)(q21.32q23) | 3           | 125916715     | 140768168   | 14.9      |
|                          |                                                                                 | 15          | 51921437      | 62998451    | 11.1      |
|                          |                                                                                 | 18          | 58803741      | 77856022    | 19.1      |
| VUB31_D_12               | Unbalanced female, dup(1)(q21.1q44)                                             | 1           | 144041843     | 248351025   | 104.3     |
| VUB31_D_24               | Unbalanced female, del(3)(p26.3)                                                | 3           | 233708        | 658659      | 0.4       |
| VUB31_D_25               | Unbalanced female, dup(9)(p22.3),<br>dup(10)(p11.1p11.21)                       | 9           | 104476        | 15320901    | 15.2      |
|                          |                                                                                 | 10          | 37455731      | 38148165    | 0.7       |
| VUB31_D_27               | Unbalanced female, dup(1)(p13.2q44)                                             | 1           | 114680507     | 248776442   | 134.1     |
| VUB31_D_28               | Unbalanced female, dup(1)(q21.1q44)                                             | 1           | 144041843     | 248776442   | 104.7     |

# Supplementary Figure 2: Overview of the flow cytometry profiles for the cell cycle analysis

Cell cycle profiles of hESC (N = 2 for VUB14 and N = 2 for VUB31) growing in the four culture densities A - D. The fractions of cells in G1 (green), S (yellow) and G2/M (blue) were determined by the Dean-Jett-Fox model using Flowjo software. An overlay of all cell cycle fractions is provided for each replicate.

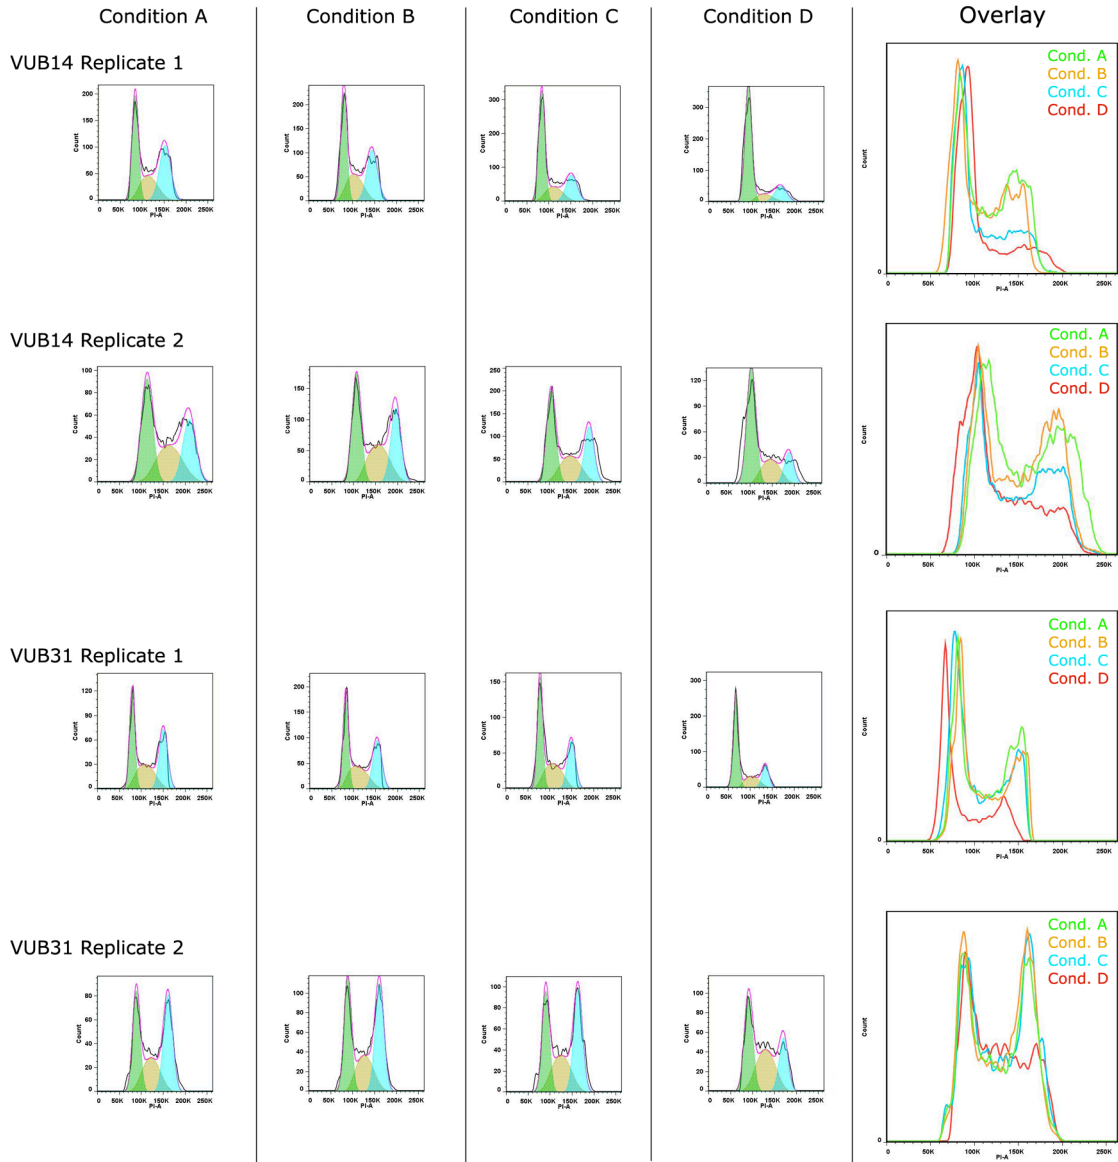

### Supplementary Figure 3: mRNA quantification of the pluripotency markers *NANOG* and *POU5F1*.

Messenger RNA of *NANOG* and *POU5F1* was quantified by quantitative real-time PCR for VUB14 (N = 1) and VUB31 (N = 2) grown in the four culture densities. The gene-expression is plotted relative to that of cells growing in culture condition A (lowest density), and in a  $\log_{10}$  scale. OPL stands for osteoprogenitor-like cells, which are differentiated hESC. X stands for undetectable levels of expression. Results are presented as means  $\pm$  SEM.

All hESC groups show at least a 4000-fold higher expression as compared to OPLs ( $p \leq 0.01$ ; two-way ANOVA). Nevertheless, when comparing the highest density condition (D) to the lowest (A) there was a trend to a lower expression of these markers in condition D (a two-fold change for *NANOG* ( $p \leq 0.01$ ; two-way ANOVA) and a six-fold change for *POU5F1* ( $p \leq 0.01$ ; two-way ANOVA). Taken together, this indicates that whilst the analyzed cells were still undifferentiated, there appears to be a small loss in pluripotency in the highest density condition. However, the change in cell cycle profile (see Supplementary Fig. 1b) cannot be accounted for by the relative loss of pluripotency only, as testified by the insignificant differences in *NANOG* and *POU5F1* expression between C and D, while, in contrast to condition D, the cell cycle profile for condition C is still indistinguishable from condition A.

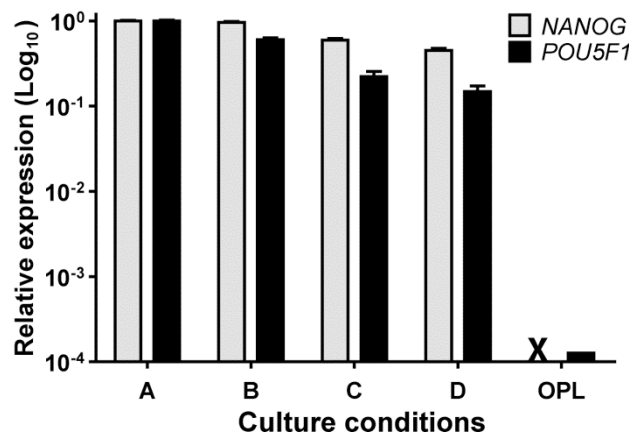

**Supplementary Table 3: Overview of lactate concentration and pH of all analyzed samples.**

Lactate concentrations and pH values of the medium at the time of analysis of (a) the culture density series, (b) the lactic acid addition experiments, (c) the modified pH experiments, (d) the prevention experiments, (e) the four cell densities grown in medium supplemented with 25mM HEPES and (f) the four cell densities grown on Laminin-521. All values are presented as mean  $\pm$  SEM.

| a)               | MEF only        | A               | B               | C                | D                |
|------------------|-----------------|-----------------|-----------------|------------------|------------------|
| Lactate (mmol/L) | 2.22 $\pm$ 0.33 | 2.66 $\pm$ 0.39 | 4.91 $\pm$ 0.78 | 10.16 $\pm$ 1.34 | 14.39 $\pm$ 0.71 |
| pH               | 7.44 $\pm$ 0.03 | 7.29 $\pm$ 0.03 | 7.25 $\pm$ 0.03 | 7.10 $\pm$ 0.03  | 6.90 $\pm$ 0.03  |

| b)               | L1              | L2              | L3              | L4               |
|------------------|-----------------|-----------------|-----------------|------------------|
| Lactate (mmol/L) | 0.87 $\pm$ 0.15 | 5.07 $\pm$ 0.15 | 9.73 $\pm$ 0.20 | 13.77 $\pm$ 0.03 |
| pH               | 7.37 $\pm$ 0.01 | 7.29 $\pm$ 0.01 | 7.19 $\pm$ 0.01 | 7.06 $\pm$ 0.01  |

| c) | pHA             | pHB             | pHC             | pHD             |
|----|-----------------|-----------------|-----------------|-----------------|
| pH | 7.37 $\pm$ 0.01 | 7.25 $\pm$ 0.01 | 7.07 $\pm$ 0.02 | 6.79 $\pm$ 0.05 |

| d)               | A               | pA              | B               | pB              | C               | pC              | D                | pD              |
|------------------|-----------------|-----------------|-----------------|-----------------|-----------------|-----------------|------------------|-----------------|
| Lactate (mmol/L) | 2.25 $\pm$ 0.67 | 0.15 $\pm$ 0.15 | 4.78 $\pm$ 0.84 | 0.90 $\pm$ 0.11 | 9.43 $\pm$ 0.34 | 3.45 $\pm$ 0.89 | 13.73 $\pm$ 0.10 | 3.98 $\pm$ 0.94 |
| pH               | 7.24 $\pm$ 0.01 | 7.32 $\pm$ 0.02 | 7.21 $\pm$ 0.02 | 7.30 $\pm$ 0.03 | 7.08 $\pm$ 0.04 | 7.24 $\pm$ 0.02 | 6.90 $\pm$ 0.06  | 7.18 $\pm$ 0.03 |

| e) | HA              | HB              | HC              | HD              |
|----|-----------------|-----------------|-----------------|-----------------|
| pH | 7.34 $\pm$ 0.01 | 7.33 $\pm$ 0.01 | 7.19 $\pm$ 0.02 | 6.94 $\pm$ 0.03 |

| f) | LaA             | LaB             | LaC             | LaD             |
|----|-----------------|-----------------|-----------------|-----------------|
| pH | 7.41 $\pm$ 0.01 | 7.40 $\pm$ 0.01 | 7.10 $\pm$ 0.01 | 6.93 $\pm$ 0.01 |



### Supplementary Table 4: Overview of all abnormalities detected with FISH

- a) All abnormalities found using interphase-FISH for chromosome 18 in density condition A and D and their respective rescue conditions. The experiment was performed in triplicate (N = 2 for VUB31 and N = 1 for VUB14) and the sum of all abnormalities found over the three experiments is listed here.
- b) All abnormalities found using interphase-FISH for chromosome 18 in laminin-cultured hESC of conditions LaA and LaD. The experiment was performed in triplicate (VUB07, VUB14 and VUB31) and the sum of all abnormalities found over the three experiments is listed here.

p+ and p- stand for gain and loss of the p-telomere respectively. q+ and q- stand for gain and loss of the q-telomere respectively. 18+ and 18- stand for trisomy and monosomy 18 respectively.

| <b>a)</b> | <b>Total number<br/>of cells</b> | <b>p+</b> | <b>p-</b> | <b>q+</b> | <b>q-</b> | <b>18+</b> | <b>18-</b> |
|-----------|----------------------------------|-----------|-----------|-----------|-----------|------------|------------|
| <b>A</b>  | 1203                             | 4         | 3         | 4         | 3         | 0          | 0          |
| <b>pA</b> | 938                              | 3         | 0         | 8         | 0         | 0          | 0          |
| <b>D</b>  | 1510                             | 5         | 5         | 12        | 3         | 2          | 2          |
| <b>pD</b> | 1207                             | 3         | 5         | 8         | 0         | 0          | 0          |

| <b>b)</b>  | <b>Total number<br/>of cells</b> | <b>p+</b> | <b>p-</b> | <b>q+</b> | <b>q-</b> | <b>18+</b> | <b>18-</b> |
|------------|----------------------------------|-----------|-----------|-----------|-----------|------------|------------|
| <b>LaA</b> | 1200                             | 4         | 5         | 8         | 6         | 0          | 2          |
| <b>LaD</b> | 635                              | 1         | 2         | 2         | 4         | 0          | 1          |
